1 **Adult and regenerating planarians respond differentially to chronic drug exposure**

2 Kevin Bayingana<sup>a\*</sup>, Danielle Ireland<sup>a\*</sup>, Elizabeth Rosenthal<sup>a\*</sup>, Christina Rabeler<sup>a</sup>, and Eva-Maria  
3 S. Collins<sup>a,b,c+</sup>

4

5 <sup>a</sup> Department of Biology, Swarthmore College, Swarthmore, Pennsylvania, United States of  
6 America

7 <sup>b</sup> Department of Physics and Astronomy, Swarthmore College, Swarthmore, Pennsylvania, United  
8 States of America

9 <sup>c</sup> Department of Neuroscience, Perelman School of Medicine, University of Pennsylvania,  
10 Philadelphia, Pennsylvania, United States of America

11

12

13 \*these authors contributed equally to this work

14

15 + Corresponding author: Eva-Maria S. Collins

16 Email: [ecollin3@swarthmore.edu](mailto:ecollin3@swarthmore.edu)

17 Address: 500 College Avenue, Swarthmore College, Swarthmore, PA 19081

18

19

## 20 **Abstract**

21 There is a lack of data on the effects of chronic exposure to common drugs and stimulants on the  
22 developing nervous system. Freshwater planarians have emerged as a useful invertebrate model  
23 amenable to high-throughput behavioral phenotyping to assay chemical safety in adult and  
24 developing brains. Here, we leverage the unique strength of the system to test in parallel for effects  
25 on the adult and developing nervous system, by screening ten common drugs and stimulants  
26 (forskolin, clenbuterol, LRE-1, MDL-12,330A, adenosine, caffeine, histamine, mianserin,  
27 fluoxetine and sertraline) using the asexual freshwater planarian *Dugesia japonica*. The  
28 compounds were tested up to 100  $\mu$ M nominal concentration for their effects on planarian  
29 morphology and behavior. Quantitative phenotypic assessments were performed on days 7 and 12  
30 of exposure using an automated screening platform. The antidepressants sertraline and fluoxetine  
31 were the most potent to induce lethality, with significant lethality observed at 10  $\mu$ M. All ten  
32 compounds caused sublethal morphological and/or behavioral effects, with the most effects, in  
33 terms of potency and breadth of endpoints affected, seen with mianserin and fluoxetine. Four of  
34 the compounds (forskolin, clenbuterol, mianserin, and fluoxetine) were developmentally selective,  
35 causing effects at lower concentrations in regenerating planarians. Of these, fluoxetine showed the  
36 greatest differences between the two developmental stages, inducing many behavioral endpoints  
37 in regenerating planarians but only a few in adult planarians. While some of these behavioral  
38 effects may be due to neuroefficacy, these results substantiate the need for better evaluation of the  
39 safety of these common drugs on the developing nervous system.

40

41

42 **Keywords**

43 drugs; fluoxetine; mianserin; behavior; brain development; New Approach Method

44

45 **1. Introduction**

46 Over-the-counter (OTC) and prescription drugs are widely used to treat common ailments.  
47 According to data from the Centers for Disease Control and Prevention, about 46% of adults in  
48 the United States used prescription drugs in the last 30 days (2019). More than 90% of women  
49 take OTC drugs during pregnancy (Servey and Chang 2014) and most pregnant women use at least  
50 one prescription drug (Daw et al. 2011). Common OTC medications and prescription drugs used  
51 during pregnancy include antidepressants, antiemetics, antibiotics, analgesics, histamine receptor  
52 agonists and antagonists, heart medications, and cancer medication (Servey and Chang 2014; Haas  
53 et al. 2018). Antidepressant usage is more than twice as common in women than in men (CDC  
54 website). It is estimated that 2-3% of pregnant women take antidepressants during pregnancy  
55 (Dubovicky et al. 2017), with some longitudinal studies citing prevalence as high as 6% (Haas et  
56 al. 2018), raising concerns about possible side effects on the developing child. Selective serotonin  
57 reuptake inhibitors (SSRIs), such as fluoxetine and sertraline, are the most commonly used  
58 antidepressants during pregnancy (Cipriani et al. 2009; Dubovicky et al. 2017).

59 Antihistamine usage is also prevalent during pregnancy, to treat common allergies or  
60 dermatological symptoms like pruritus. About 10-15% of American women reported antihistamine  
61 use during pregnancy based on data from 1997 – 2011 (Hansen et al. 2020). Beta-adrenergic  
62 agonists are commonly used as bronchodilators as the treatment of choice for asthma, including  
63 during pregnancy (Billington et al. 2017). This drug class has also been used off-label to inhibit

64 uterine contractions during pre-term labor, though the effectiveness of this treatment is unclear  
65 (The Canadian Preterm Labor Investigators Group 1992).

66 The safety of these drugs during pregnancy, however, remains unclear (So et al. 2010;  
67 Hansen et al. 2020) and usage of some drugs, such as the beta-adrenergic agonists, has been  
68 correlated with increased risk of neurological disorders, including Autism Spectrum Disorder  
69 (Witter et al. 2009). It is particularly difficult to ascertain the safety of these chemicals to the  
70 developing embryo because of the ethical concerns of human clinical trials with pregnant women.  
71 Thus, safety decisions are largely based on animal data that is expensive and time-consuming to  
72 obtain. Because of these limitations, the possible long-term effect that prenatal and early life  
73 exposure to these drugs has on the developing nervous system is largely understudied. Therefore,  
74 there is an urgent need for alternative high-throughput new approach methods to fill this data gap.  
75 High-throughput *in vitro* testing using mammalian or human cell lines has become a popular  
76 alternative for some toxicity assays, e.g., skin sensitization tests, and has successfully replaced  
77 traditional animal testing (OECD 2021). However, neurotoxicity and developmental neurotoxicity  
78 studies are especially difficult to assess *ex-vivo* (Bal-Price et al. 2010). Nervous system  
79 development and function depends on a complex network of signaling pathways spanning multiple  
80 cell types (e.g., neurons and glia), which is hard to recapitulate in 2-D culture systems. Therefore,  
81 non-mammalian organismal models have gained popularity for detecting systems-level adverse  
82 outcomes on the nervous system in a time- and cost-efficient manner (Peterson et al. 2008;  
83 Giacomotto and Ségalat 2010). Invertebrate models, such as fruit flies (Rand 2010; Chifiriuc et al.  
84 2016), nematodes (Helmcke et al. 2010; Ruskiewicz et al. 2018; Hunt et al. 2020), and freshwater  
85 flatworms (planarians) (Hagstrom et al. 2016; Wu and Li 2018), occupy a special role in this  
86 context. Due to their small size, they are amenable to high-throughput screening (HTS) in 48-, 96-

87 or even 384-well plate formats, allowing for rapid screening of large chemical libraries (Ségalat  
88 2007; Helmcke et al. 2010; Rand 2010; Giacomotto and Ségalat 2010; Hagstrom et al. 2016; Zhang  
89 et al. 2019a).

90 Fruit flies and nematodes, however, are difficult to dose with chemicals. Fruit flies cannot  
91 be grown in culture and nematodes have a cuticle which impedes chemical absorption (Giacomotto  
92 and Ségalat 2010; Kokel et al. 2012). In contrast, planarians are easily exposed to chemicals in  
93 their aquatic environment. Moreover, planarians have a wide array of robust phenotypic behaviors  
94 that are amenable to automated analysis and can be used for efficient functional screening of  
95 neurotoxicants (Zhang et al. 2019a; Ireland et al. 2020). Moreover, because of the similar size of  
96 adult and regenerating planarians, it is possible to screen adult and developing animals together  
97 using the same assays, enabling unprecedented studies comparing chemical toxicity in adults and  
98 during development (Hagstrom et al. 2015; Zhang et al. 2019a, b).

99 This unique strength allows us to evaluate whether chronic (12 day) exposure to commonly  
100 used drugs and stimulants differentially affects the developing versus the adult nervous system.  
101 We chose a set of ten compounds that are known to affect adenylyl cyclase, beta-adrenergic receptor,  
102 adenosine receptor, histamine receptor, or 5-HT (serotonin) receptor activities in the mammalian  
103 brain (**Table 1**), pathways which are targeted by some common drugs as described above. The  
104 specific compounds were selected based on their possible use during pregnancy, including OTC  
105 (forskolin, caffeine) and prescription drugs (fluoxetine, sertraline, mianserin, clenbuterol,  
106 adenosine), or for their known use in research to target some of these pathways (LRE-1, MDL-  
107 12,330A, histamine). Adenosine and caffeine were included because maternal cardiac arrhythmias  
108 are common during pregnancy and can be treated with intravenous injection of adenosine for acute  
109 termination of certain types of tachycardia (Ferrero et al. 2004; Joglar and Page 2012). Caffeine is

110 an antagonist for the adenosine receptor and widely consumed among pregnant women in the U.S.  
111 (Chen et al. 2014). Moreover, several of the ten compounds have existing studies in flatworms  
112 (forskolin, caffeine, MDL-12, 330A, mianserin, histamine, fluoxetine, sertraline; **Supplemental**  
113 **Table**) enabling a direct comparison of our results with the literature.

114 Using an automated, robotic HTS system, we assayed a broad array of morphological and  
115 behavioral endpoints at two time points (days 7 and 12). We found that there were differential  
116 effects of some of these drugs, most notably mianserin and fluoxetine, both in terms of endpoints  
117 affected and in potency, in adult and regenerating planarians. Regenerating planarians were  
118 especially sensitive to fluoxetine exposure, warranting further studies into the vulnerable time for  
119 fluoxetine exposure and the molecular mechanisms by which fluoxetine may affect the developing  
120 brain.

121

## 122 **2. Materials and methods**

### 123 **2.1. Planarian maintenance**

124 We used asexual *D. japonica* planarians cultivated as described previously (Zhang et al. 2019a;  
125 Ireland et al. 2020). Planarians were reared in plastic containers with 0.5 g/L Instant Ocean (IO)  
126 water (Spectrum Brands, Blacksburg, VA, USA) and stored in the dark at 20°C when not used for  
127 experiments. Planarians were fed beef liver once or twice per week and cleaned the day of feeding  
128 and two days after feeding.

129

### 130 **2.2. Chemicals**

131 A list of the 10 drugs tested (including CAS number identifier and water solubility) is provided in  
132 **Table 1**. All chemicals were purchased from Sigma-Aldrich (St. Louis, MO, USA) and had a  
133 purity of  $\geq 98\%$ . Stock solutions were prepared in 100% dimethyl sulfoxide (DMSO, Sigma-  
134 Aldrich). Each drug was tested at a nominal concentration of 1, 3.16, 10, 31.6, and 100  $\mu\text{M}$ , with  
135 a final DMSO concentration of 0.5%, which has no effect on the morphology or behavior of *D.*  
136 *japonica* (Hagstrom et al. 2015). Because significant effects were present in the lowest tested  
137 concentrations of fluoxetine and mianserin in regenerating planarians, these chemicals were  
138 rescreened in regenerating planarians at 0.00316, 0.01, 0.0316, 0.1, and 0.316  $\mu\text{M}$  and at 0.316  
139  $\mu\text{M}$ , respectively. L-ascorbic acid (100  $\mu\text{M}$ ) was used as a negative control because it previously  
140 had no effect on any endpoint in our screening assay (Zhang et al. 2019a).

141  
142 **Table 1: Chemical overview.** The highest concentration of all chemicals tested was 100  $\mu\text{M}$ . Water  
143 solubility information was obtained from the Sigma-Aldrich safety data sheet, DrugBank, or PubChem.  
144 Because activation of beta-adrenergic receptors subsequently upregulates adenylyl cyclase, clenbuterol was  
145 grouped with the chemicals targeting adenylyl cyclase. N/A: not available.

| Chemical                  | Mode of action                         | CAS #        | Water solubility ( $\mu\text{M}$ ) |
|---------------------------|----------------------------------------|--------------|------------------------------------|
| Forskolin                 | Adenylyl cyclase agonist               | 66575-29-9   | $2.7 \times 10^3$                  |
| Clenbuterol hydrochloride | Beta-adrenergic receptor agonist       | 21898-19-1   | $3.6 \times 10^2$                  |
| LRE-1                     | Adenylyl cyclase antagonist            | 1252362-53-0 | N/A                                |
| MDL-12,330A hydrochloride | Adenylyl cyclase antagonist            | 40297-09-4   | $8.0 \times 10^3$                  |
| Adenosine                 | Adenosine receptor agonist             | 58-61-7      | $5.2 \times 10^4$                  |
| Caffeine                  | Adenosine receptor antagonist          | 58-08-2      | $1.1 \times 10^5$                  |
| Histamine dihydrochloride | Histamine receptor agonist             | 56-92-8      | $9.0 \times 10^5$                  |
| Mianserin hydrochloride   | Histamine receptor antagonist          | 21535-47-7   | $7.7 \times 10^2$                  |
| Fluoxetine hydrochloride  | Selective serotonin reuptake inhibitor | 56296-78-7   | $4.0 \times 10^4$                  |
| Sertraline hydrochloride  | Selective serotonin reuptake inhibitor | 79559-97-0   | 0.4                                |
| L-ascorbic acid           | Negative control                       | 50-81-7      | $1.4 \times 10^6$                  |

146

### 147 **2.3. Chemical exposure**

148 Screening plate set-up was performed as previously described (Zhang et al. 2019a). On the day of  
149 plate set-up (day 1), we randomly selected normally gliding worms that had been starved for at  
150 least 5 days. For adult planarians, we used worms of 5-10 mm length. For the regenerating  
151 planarians, slightly larger individuals were selected such that the final sizes of the amputated tail  
152 pieces were similar to that of the adult planarians. Regenerating worms were amputated below  
153 their auricles and above their pharynx with an ethanol-sterilized razor blade shortly before (< 3  
154 hours) exposing them to the test compounds. The chemicals were tested on adult and regenerating  
155 worms separately, with the 5 concentrations and the 0.5% DMSO control in separate rows of each  
156 48-well plate (Genesee Scientific, San Diego, CA; catalog # 25-108). The plates were sealed with  
157 ThermalSeal RTS seals (Excel Scientific, Victorville, CA) and kept in the dark, except for during  
158 screening. For each drug and concentration, we screened 3 replicates with n=8 planarians for each  
159 replicate, for a total n=24. For some chemicals, reruns were performed due to issues with vehicle  
160 control health or technical malfunctions, and thus n>24 for certain conditions. For each replicate,  
161 the orientation of the chemical concentrations was shifted to reduce the impact of edge effects  
162 (Zhang et al. 2019a).

163

### 164 **2.4. Screening endpoints**

165 Using a modified version of the fully automated HTS platform (Zhang et al. 2019a), we tested  
166 adult and regenerating worms using morphological and behavioral endpoints on day 7 and day 12  
167 post-exposure. Our screening platform consists of a robotic microplate handler (Hudson Robotics,



168 Springfield Township, NJ), and multiple cameras and assay stations as previously described  
169 (Zhang et al. 2019a).

170 Systemic toxicity endpoints consisted of lethality, body shape, eye regeneration (for regenerating  
171 worms only), and stickiness. Body shape was categorized both as the presence of any abnormal  
172 body shape and also separated out into distinct body shapes (e.g., lesion, contracted, C-shape,  
173 corkscrew, muscle waves) (Hagstrom et al. 2016; Ireland et al. 2020). Criteria used to distinguish  
174 the body shapes are provided in **Table 2** and example images are in **Figure 1**. Each planarian could  
175 be scored with up to 3 different abnormal body shapes. Behavioral endpoints consisted of measures  
176 of locomotion and spatial exploration, phototaxis, thermotaxis, and response to noxious heat, as  
177 described previously (Zhang et al. 2019a; Ireland et al. 2020, 2022). For all endpoints, data was  
178 analyzed using custom MATLAB scripts (MathWorks, Natick, MA). Any manual analyses were  
179 conducted by an investigator without knowledge of the identity of the drugs.

180

181 **Table 2: Body shape definitions.** Definitions included are only for shapes observed in this study.

| <b>Body shape</b> | <b>Definition</b>                                                                                   |
|-------------------|-----------------------------------------------------------------------------------------------------|
| Lesions           | Loss of pigment, head regression or abnormal head shape, partial disintegration                     |
| Contracted        | Shortened length, presence of ruffling along the exterior, immobile                                 |
| C-shaped          | C-shape, curled, or on its side                                                                     |
| Corkscrew         | Twisting around itself, screw-like hyperkinesia                                                     |
| Muscle Waves      | Muscle waves, oscillation of length (e.g., peristalsis or scrunching (Cochet-Escartin et al. 2015)) |

182

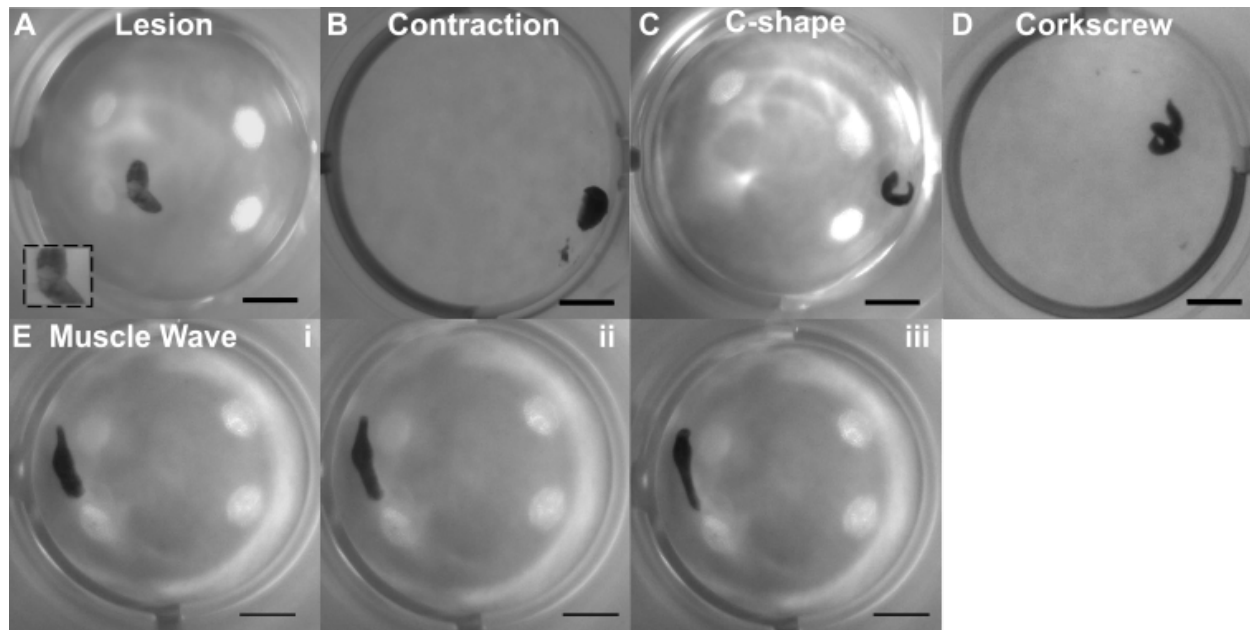

183

184 **Figure 1.** Examples of abnormal body shapes. (A-D) Example images of static body shapes: A) lesion, B)  
185 contracted, C) C-shape, and D) corkscrew. The inset in (A) shows a zoom-in of the lesioned area on the  
186 worm. E) Example image sequence of the dynamic muscle wave body shape. Muscle wave is shown as an  
187 oscillatory sequence of movement that begins from the head and propagates down the longitudinal axis of  
188 the planarian body. Scale bar: 2 mm. Brightness of the original images was adjusted as necessary to aid  
189 visualization. Exposure conditions: A: MDL-12, 330A; B, D, and E: mianserin; C: sertraline.

190

## 191 2.5. Statistical analysis

192 Statistical analysis was performed on compiled data from at least triplicate runs. Each  
193 concentration was compared with its 0.5% DMSO control as previously described (Zhang et al.  
194 2019a). For lethality, eye regeneration, body shape, stickiness and scrunching endpoints, statistical  
195 significance was determined using one tailed Fisher's exact test. For speed, resting, thermotaxis,  
196 phototaxis, noxious heat sensing, anxiety, and locomotor bursts, we used a parametric two-tailed  
197 t-test or a nonparametric two-tailed Mann-Whitney U test depending on whether the sample

198 distribution was normal or not, respectively. Normality of the samples was determined using  
199 Lilliefors's test. A p-value less than 0.05 was statistically significant. Speed endpoints consisted of  
200 the average speed in 30 second bins throughout the phototaxis assay. For the dark period, if a  
201 specific concentration of a drug caused a significant effect in at least half of the increments, then  
202 it was marked as a hit for the dark period. For the blue light period, a hit in either of the 30 second  
203 bins constituted a hit for the whole light period. This distinction between light and dark was made  
204 because we observed more variability in the control behavior during the dark period.

205 We excluded inconsistent hits where only one replicate was statistically significant while the other  
206 two were not, as in (Zhang et al. 2019a). **Figure 2** provides an overview of our statistical pipeline.  
207 We report the data using lowest observed effect levels (LOELs), indicative of the lowest  
208 concentration with a statistically significant hit.

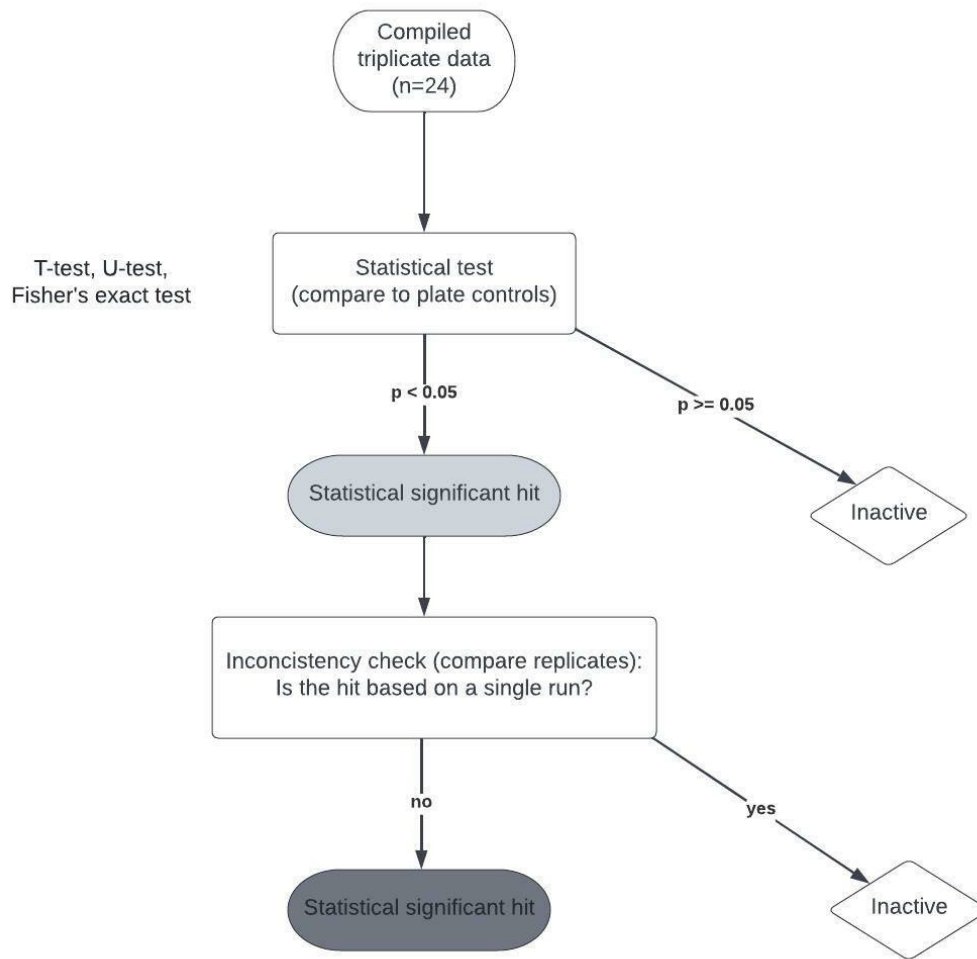

209

210 **Figure 2: Workflow of statistical analysis.**

211

## 212 **2.6. Eye regeneration**

213 To more closely evaluate effects on eye regeneration, regenerating planarians were exposed to  
214 mianserin and fluoxetine at 0.316, 1, 3.16  $\mu$ M. The presence of eyes was manually scored every  
215 day until day 5. Duplicate experiments, each with 5 worms per condition, were performed for total  
216 of n=10 per condition.

217

## 218 **2.7. Acetylcholinesterase activity**

219 Thirty-six adult or regenerating planarians were exposed to either 0.5% DMSO solvent control,  
220 3.16  $\mu$ M fluoxetine, or 31.6  $\mu$ M mianserin for 12 days. The planarians were maintained in 12-well  
221 plates (Genesee Scientific), with 6 planarians per well and a total volume of 1.2 mL of the test  
222 solution to keep the ratio of chemical/planarian consistent with the screening set-up. Any fission  
223 events or planarians from wells with death were excluded from the assay. Post-exposure, the  
224 planarians were washed 3X with IO water and homogenized in 1% Triton X-100 in PBS as  
225 described in (Hagstrom et al. 2017, 2018a). An Ellman assay (Ellman et al. 1961) was performed  
226 using an Acetylcholinesterase activity assay kit (Sigma-Aldrich). Absorbance was read at 412 nm  
227 every minute for 10 minutes using a VersaMax (Molecular Devices, San Jose, CA)  
228 spectrophotometer. Acetylcholinesterase activity was calculated as the rate of change of  
229 absorbance per minute during the linear portion of the reaction and normalized by protein  
230 concentration as determined by a Coomassie (Bradford) protein assay kit (Thermo Scientific,  
231 Waltham, MA). Activity was compared to the solvent control samples (set at 100% activity).  
232 Activity measurements were performed with at least three technical replicates and at least 2  
233 independent experiments (biological replicates).

234

## 235 **3. Results**

### 236 **3.1 Effects in adult planarians**

237 Lethality was observed for all drugs in adult planarians in the tested concentration range (up to  
238 100  $\mu$ M), except for adenosine, caffeine, and histamine (**Figure 3A**). The tested SSRIs, fluoxetine  
239 and sertraline, showed the greatest toxicity, with significant lethality in adult planarians as low as

240 10  $\mu$ M. Notably, sertraline has generally low water solubility (0.4  $\mu$ M, **Table 1**), but as we  
241 observed lethality starting at 10  $\mu$ M, a sufficient amount must be solubilized in our conditions,  
242 likely aided by the addition of DMSO. Mianserin was the only compound to cause abnormal body  
243 shapes (muscle waves and corkscrew) at day 7, which appeared with exposure as low as 1  $\mu$ M. On  
244 day 12, abnormal body shapes (c-shapes) were also observed for adenosine at 100  $\mu$ M. Increased  
245 stickiness was only observed in adult planarians exposed to 10  $\mu$ M MDL-12,330A.

246 All test compounds caused behavioral effects in adult planarians at sublethal concentrations  
247 (**Figure 3B**). Scrunching was one of the most sensitive endpoints which showed concentration-  
248 dependent hits. While hits were sometimes observed at lower concentrations in some of the other  
249 endpoints, they were often concentration-independent. When considering the locomotion-based  
250 endpoints (speed, resting), we observed both hypo- and hyper-active effects. Forskolin,  
251 clenbuterol, and histamine caused largely hyperactive effects (increased speed, decreased resting).  
252 Clenbuterol caused increased speed on day 7 but decreased speed on day 12, suggesting a potential  
253 change of mechanism over time. Other compounds, such as LRE-1, MDL-12,330A, adenosine,  
254 mianserin, and sertraline caused decreased speed and/or increased resting. Notably, the adenylyl  
255 cyclase and beta-adrenergic receptor drugs showed opposing effects, with the agonists clenbuterol  
256 and forskolin causing hyperactivity, while the antagonists LRE-1 and MDL-12,330A caused  
257 hypoactivity. Additionally, these four drugs caused effects on scrunching and/or the strength of  
258 reaction to the heat (noxious stimuli strength), though the directionality of these effects was not  
259 correlated with the agonism/antagonism of the pathways.

260

261

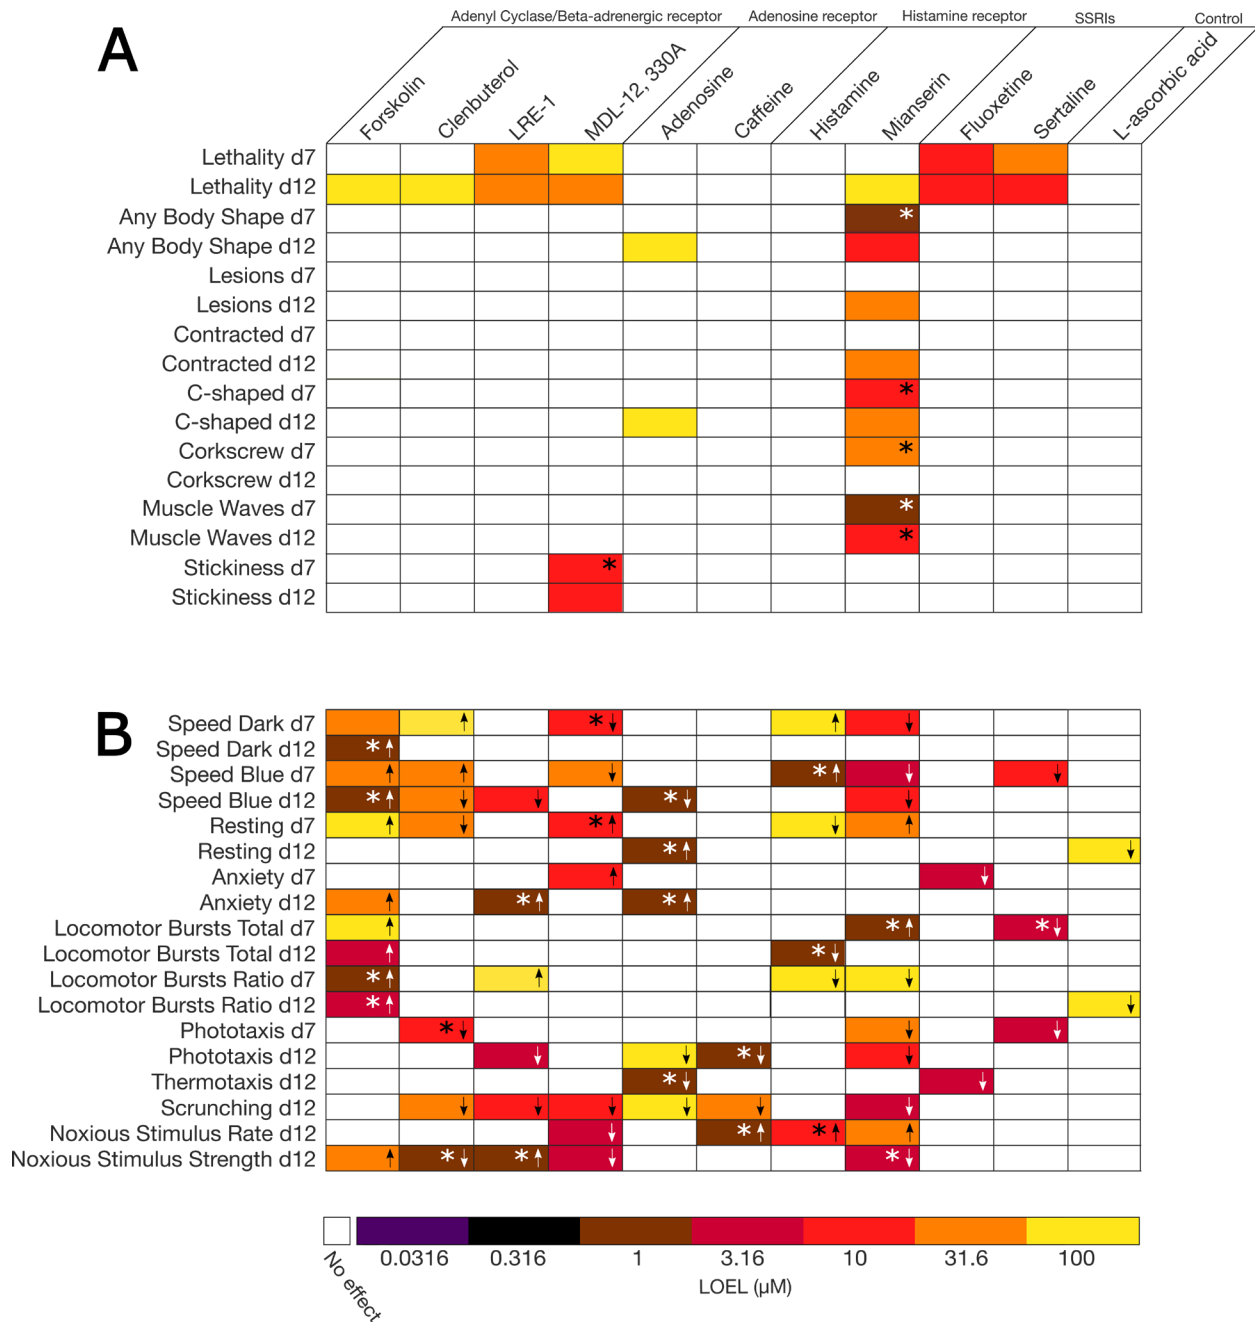

262

263 **Figure 3: Heat map of effects in adult planarians.** The lowest observed effect levels (LOELs) on days 7

264 (d7) and 12 (d12) of exposure are indicated for (A) systemic toxicity endpoints and (B) behavioral

265 endpoints. For all endpoints besides lethality, only sublethal effects are shown. Drugs boxed are thought to

266 act on the same receptor, with the drugs in the left-half of each box being agonists and the drugs in the

267 right-half being receptor antagonists. The negative control L-ascorbic acid was only tested at 100  $\mu$ M. \*

268 indicates concentration-independent effects. Arrows in (B) indicate the directionality of the effect compared  
269 to the vehicle controls.

270 The tested adenosine receptor drugs, adenosine and caffeine, caused relatively few hits, with  
271 significant effects only seen on day 12. Adenosine caused concentration-independent effects in  
272 speed in the blue period, anxiety and thermotaxis at 1  $\mu\text{M}$ , as well as defects in phototaxis and  
273 scrunching at 100  $\mu\text{M}$ . Similarly, with caffeine, concentration-dependent effects were only  
274 observed for scrunching at 31.6  $\mu\text{M}$ .

275 Mianserin caused hypoactive effects on many endpoints, with significant effects observed for  
276 11/18 behavioral endpoints and effects on both day 7 and day 12, at concentrations as low as 1  $\mu\text{M}$   
277 for concentration-independent effects and 3.16  $\mu\text{M}$  for concentration-dependent effects.

278 For the SSRIs, we observed relatively few behavioral effects and only at the highest sublethal  
279 concentration (3.16  $\mu\text{M}$ ). For fluoxetine, effects on both day 7 (anxiety) and day 12 (phototaxis)  
280 were observed, whereas sertraline caused effects only on day 7 (speed blue, total locomotor bursts  
281 and phototaxis).

282

### 283 **3.2. Effects in regenerating planarians**

284 Lethality was observed for forskolin, LRE-1, MDL-12,330A, mianserin, fluoxetine, and sertraline  
285 in regenerating planarians (**Figure 4A**). For forskolin, mianserin, and fluoxetine, lethality at day  
286 12 was preceded by morphological effects (i.e., abnormal body shapes or eye regeneration defects)  
287 at day 7 at the same concentration. The lesions induced by forskolin at day 7 suggest that the  
288 planarians were getting sick before forskolin became significantly lethal at day 12. As in adult



289 planarians, fluoxetine and sertraline showed the greatest toxicity, with significant lethality at 10  
290  $\mu\text{M}$ .

291 Effects on planarian body shapes at sublethal concentrations were observed for MDL-12,330A,  
292 adenosine, histamine, and mianserin. Planarians exposed to 31.6  $\mu\text{M}$  MDL-12,330A displayed  
293 contraction on day 7. Adenosine at 10  $\mu\text{M}$  caused concentration-independent contracted body  
294 shapes at day 7. Mianserin induced abnormal body shapes as low as 1  $\mu\text{M}$  (muscle waves), though  
295 this was concentration-independent. Concentration-dependent effects on shapes were observed  
296 starting at 10  $\mu\text{M}$  mianserin and included c-shapes, corkscrew, and muscle waves. Histamine  
297 caused c-shapes at day 12 at 100  $\mu\text{M}$ . MDL-12,330A caused increased stickiness on day 12.

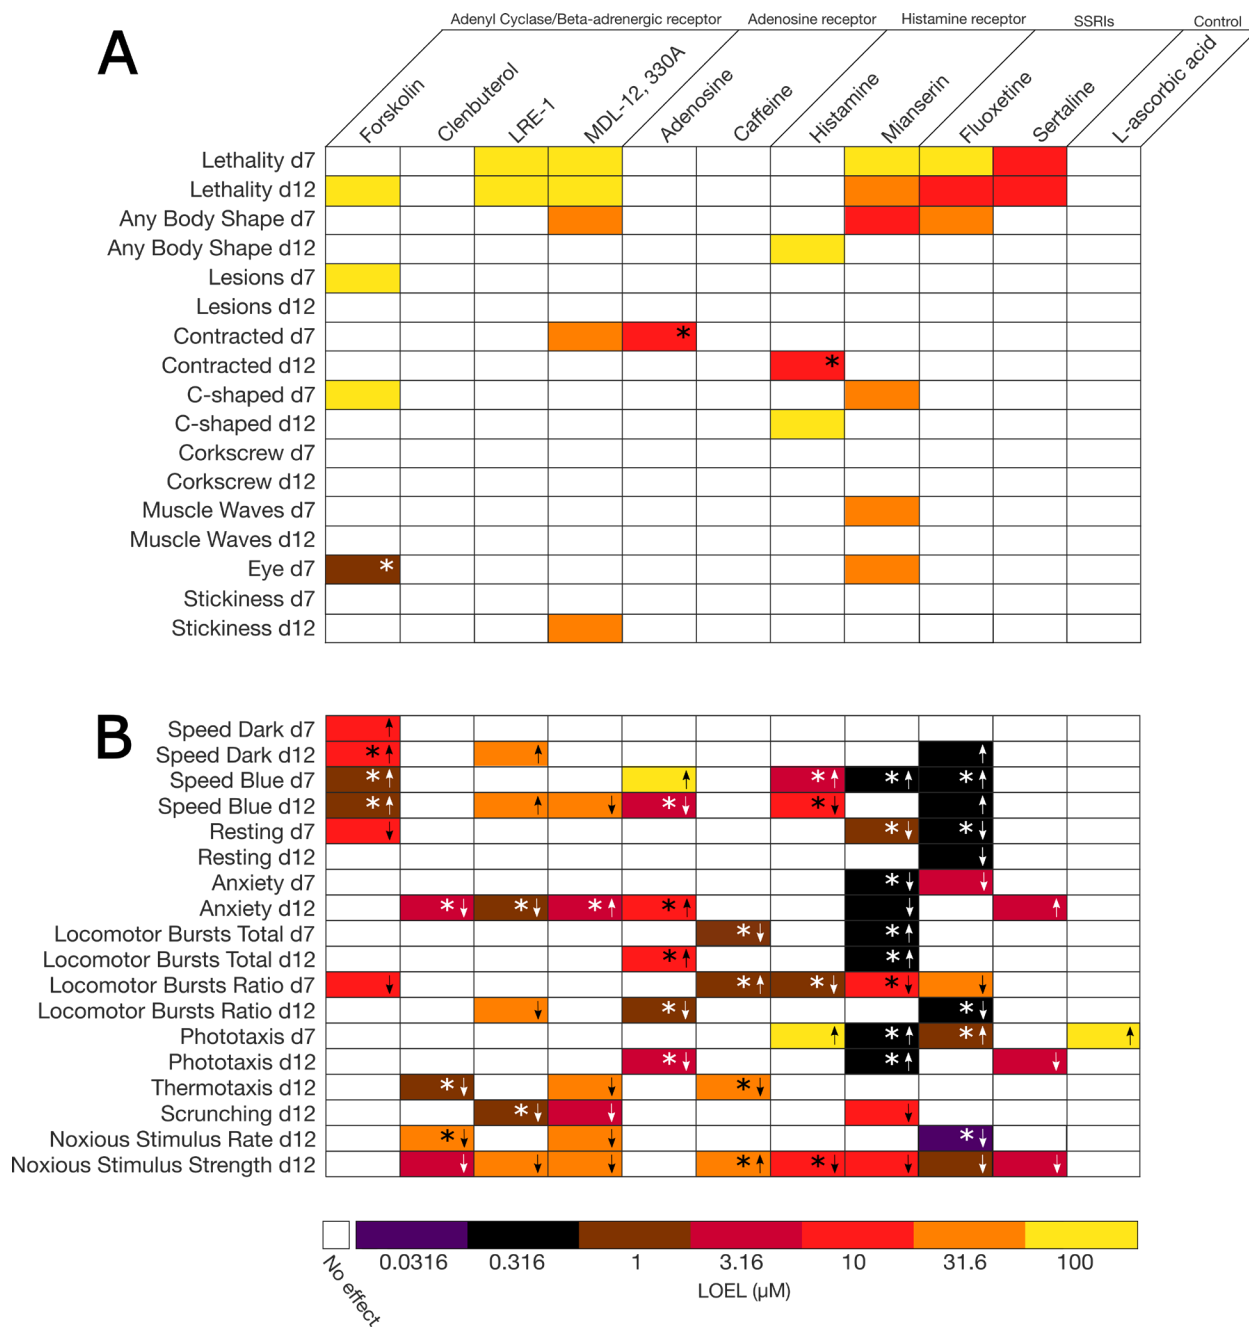

298  
 299 **Figure 4: Heat map of effects in regenerating planarians.** The lowest observed effect levels (LOELs)  
 300 on days 7 (d7) and 12 (d12) of exposure are indicated for (A) systemic toxicity endpoints and (B) behavioral  
 301 endpoints. For all endpoints besides lethality, only sublethal effects are shown. Drugs boxed are thought to  
 302 act on the same receptor, with the drugs in the left-half of each box being agonists and the drugs in the  
 303 right-half being receptor antagonists. The negative control L-ascorbic acid was only tested at 100  $\mu\text{M}$ . \*

304 indicates concentration-independent effects. Arrows in (B) indicate the direction of effects in comparison  
305 to the vehicle controls.

306

307 All compounds caused sublethal behavioral effects in regenerating planarians (**Figure 4B**). Like  
308 in adult planarians, forskolin caused hyperactive effects on locomotion. However, unlike in adults,  
309 clenbuterol did not affect locomotion in regenerating planarians and LRE-1 caused hyperactive  
310 effects on day 12. Thus, the agonist/antagonist relationship seen with adult planarians was not  
311 found in the regenerating planarians. However, noxious heat sensation was still largely affected  
312 by the adenylyl cyclase and beta-adrenergic receptor drugs as all compounds, except for forskolin,  
313 caused effects on scrunching and/or the noxious stimuli strength endpoint.

314 Adenosine and caffeine caused more hits in regenerating planarians than in adults, but these were  
315 mostly concentration-independent. Histamine similarly only caused concentration-independent  
316 effects or effects at the highest tested concentration (100  $\mu\text{M}$ ), whereas mianserin affected many  
317 behavioral endpoints, some of them at the lowest test concentrations. The most sensitive  
318 concentration-dependent effect was decreased anxiety on day 12, which was seen as low as 0.316  
319  $\mu\text{M}$ . All other effects at this concentration were concentration-independent, i.e., they did not show  
320 a monotonic concentration response. Fluoxetine similarly affected many behavioral endpoints with  
321 great sensitivity. Significant effects were seen as low as 0.0316  $\mu\text{M}$ , though concentration-  
322 dependent hits were observed starting at 0.316  $\mu\text{M}$ . Many of these sensitive hits represented  
323 hyperactive effects on locomotion. This is in stark contrast to what was observed in the adult  
324 planarians, where very few endpoints were affected and only starting at 3.16  $\mu\text{M}$ . Unlike  
325 fluoxetine, sertraline caused similar effects in adults and regenerating planarians as few endpoints  
326 (anxiety, phototaxis, and noxious stimuli strength) were affected at the highest sublethal

327 concentration (3.16  $\mu\text{M}$ ) and only at day 12. The breadth of effects, overall sensitivity, and  
328 differential sensitivity between developing and adult planarians seen with mianserin and fluoxetine  
329 prompted us to investigate these compounds in more detail.

330

### 331 **3.3 Mianserin and fluoxetine**

332 Mianserin greatly changed the behavior of adult and regenerating planarians and concentration  
333 appeared to play an important role in the manifestations of the different phenotypes. For example,  
334 a mix of different abnormal body shapes were observed in both adult and regenerating planarians  
335 and the predominant body shape was concentration-dependent (**Figure 5A**). In adult worms at day  
336 7, low to mid concentrations of mianserin (1, 10  $\mu\text{M}$ ) induced primarily muscle waves. Starting at  
337 31.6  $\mu\text{M}$ , muscle waves were observed concomitantly with c-shapes and corkscrews. At 100  $\mu\text{M}$   
338 (which was lethal by day 12), the body shapes were predominantly c-shapes or a mix of c-shapes  
339 and muscle waves. On day 12, adult worms showed muscle waves at 10  $\mu\text{M}$  and contraction and  
340 c-shapes at 31.6  $\mu\text{M}$ . Similar patterns were seen with the regenerating planarians. On day 7, the  
341 occurrence of any body shape was statistically significant starting at 10  $\mu\text{M}$ ; however, no one body  
342 shape showed statistical significance as a low incidence of contraction, c-shapes, and muscle  
343 waves was observed. Like in adults, a mixture of c-shapes and muscle waves predominated at 31.6  
344  $\mu\text{M}$  (which was lethal at day 12). Unlike in the adult worms, only a low, non-statistically  
345 significant level of contraction was observed in the day 12 regenerating planarians.

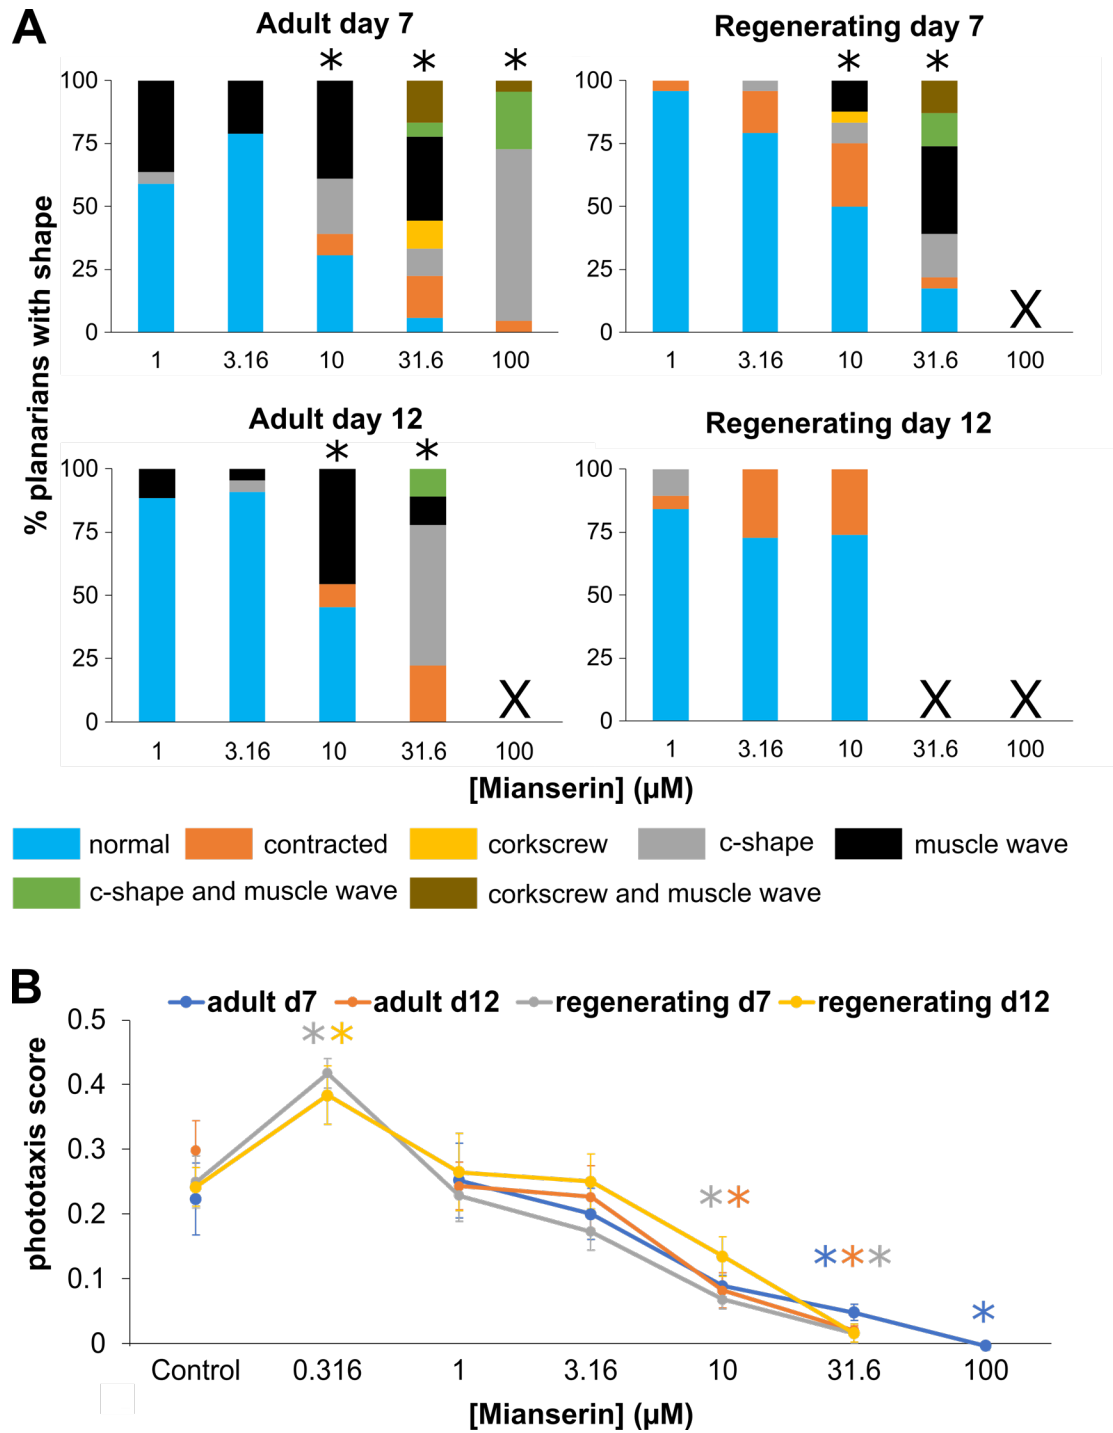

346

347 **Figure 5: The effects of mianserin change with concentration.** A) The percentage of abnormal body  
 348 shapes observed at each concentration ( $\mu\text{M}$ ) of mianserin is shown for adult and regenerating worms on  
 349 days 7 and 12. No data are shown for concentrations with significant lethality (marked with X). B)

350 Concentration-response curves of day 7 and day 12 phototaxis scores for adult and regenerating planarians  
351 exposed to mianserin. \* indicates statistical significance ( $p < 0.05$ ).

352 Additionally, a non-monotonic concentration relationship was observed in day 7 phototaxis  
353 behavior for regenerating planarians exposed to mianserin (**Figure 5B**). At 0.316  $\mu\text{M}$ , a  
354 statistically significant increase in phototaxis behavior was observed, whereas at 10 and 31.6  $\mu\text{M}$   
355 significant decreases in phototaxis behavior were observed. At day 12, the hyperactive effect at  
356 0.316  $\mu\text{M}$  was retained, but a decrease in phototaxis behavior was not seen at the higher  
357 concentrations. In adults, only hypoactive effects on phototaxis were observed. Similar trends were  
358 also observed for speed in the blue period.

359 Mianserin caused many effects at both developmental stages (**Figure 6A**), but the potency was  
360 different in the two worm types, with regenerating planarians displaying more sensitivity as they  
361 showed hits at lower concentrations compared to adult worms. As mentioned above, in  
362 regenerating planarians, mianserin exhibited both hyper- and hypo-active effects on locomotion,  
363 depending on the concentration, whereas only hypoactive locomotor effects were observed in the  
364 adults. In contrast, fluoxetine had minimal sublethal effects in adult worms - only lowering  
365 planarians' anxiety and thermotaxis at the highest sublethal concentration (3.16  $\mu\text{M}$ ). However,  
366 fluoxetine affected many endpoints related to locomotion in regenerating worms (**Figure 6B**) and  
367 at much lower concentrations (as low as 0.0316  $\mu\text{M}$ ). Several of these effects were hyperactive,  
368 such as increased speed, decreased resting, and increased phototaxis. Although some of these  
369 effects were concentration-independent, some, such as increased speed in the dark and blue periods  
370 at day 12, were concentration-dependent with effects seen at 0.316, 1 and 3.16  $\mu\text{M}$ .

371

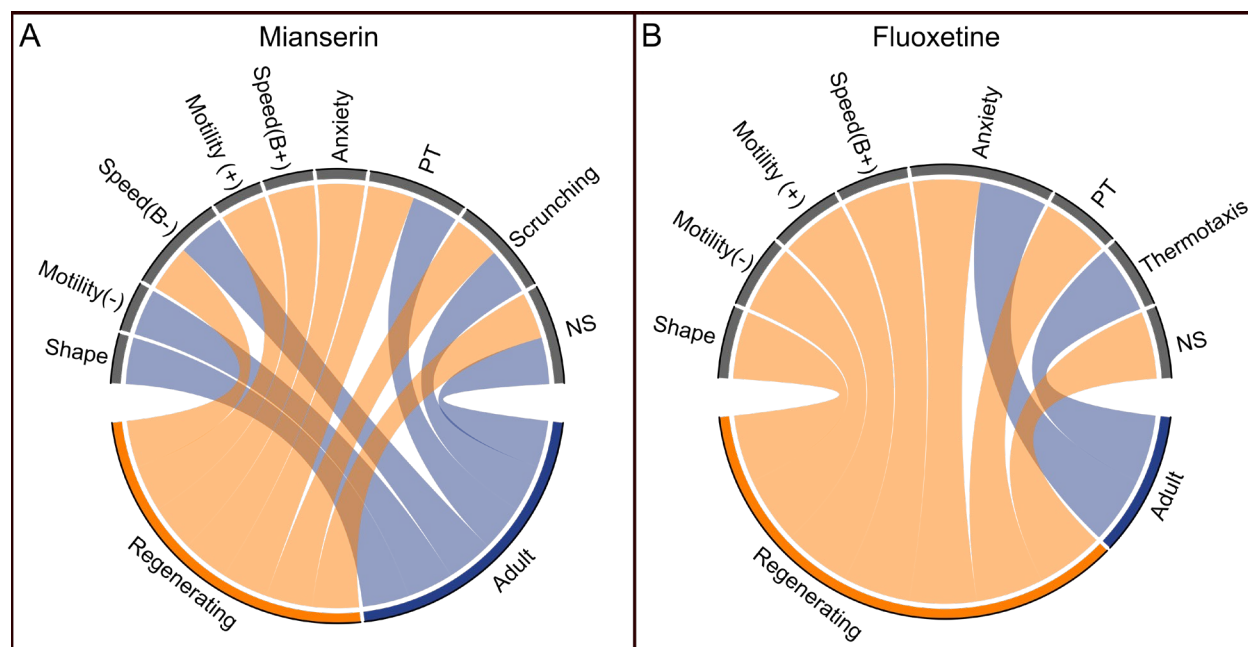

372  
373 **Figure 6: Differential effects of mianserin and fluoxetine on adult and regenerating planarians.**

374 Interaction of A) mianserin or B) fluoxetine with the different endpoint classes for adult and regenerating  
375 planarians. Connections were made if the chemical caused a hit at either day 7 or 12 at any tested  
376 concentration. Effects on speed in the dark period, resting, or locomotor bursts were combined into the  
377 “Motility” category. Speed(B): speed in the blue period, PT: Phototaxis, NS: noxious stimuli. For endpoints  
378 that had effects in either direction, either the positive (+) or negative (-) direction of the effects are noted.

379  
380 *In vitro* studies have found that fluoxetine and other anti-depressants increase neuronal  
381 proliferation rates (Chang et al. 2009). Thus, because we cannot measure regeneration rates on our  
382 HTS platform, (though we can detect delayed eye regeneration at day 7, as observed with 31.6  $\mu$ M  
383 mianserin), we assayed eye regeneration using stereo microscopy. Regenerating planarians were  
384 exposed to either mianserin or fluoxetine at 0.316, 1, or 3.16  $\mu$ M, or to 0.5% DMSO (vehicle  
385 control) and eye regeneration was manually scored every day from days 1-5. All planarians had  
386 no eyes on day 4 and had 2 eyes on day 5, demonstrating no difference associated with chemical  
387 exposure (**Supplemental Figure 1A**).

388 Additionally, antidepressants have been found to alter acetylcholinesterase expression and/or  
389 function in a variety of animal systems (Yang et al. 2018), including humans (Müller et al. 2002).  
390 Therefore, we evaluated whether acetylcholinesterase activity was altered in adult or regenerating  
391 planarians exposed for 12 days to either 3.16  $\mu$ M fluoxetine, or 31.6  $\mu$ M mianserin. These  
392 concentrations were the highest sublethal tested concentrations in adult worms. No significant  
393 inhibition was observed at these concentrations (**Supplemental Figure 1B**).

394

#### 395 **4. Discussion and conclusions**

396 It is well known that the developing brain is more sensitive to chemical exposure. However, we  
397 have little knowledge on the differential effects of compounds on the developing versus the adult  
398 brain, because studies in developing organisms are difficult. HTS using the planarian *D. japonica*  
399 is promising to fill this gap, as it allows for the parallel study of chemicals on adult and developing  
400 brains, using multiple quantitative morphological and behavioral endpoints. This allows us to  
401 detect specific developmental effects and distinguish them from general effects on the nervous  
402 system. Our screening work so far has focused on studying the effects of potential neurotoxicants  
403 on brain development and function; here, we study a group of 10 neuroactive drugs and stimulants,  
404 which we expected to show both desired neuroactive effects and neurotoxic effects. Caffeine,  
405 fluoxetine, and sertraline have known aquatic toxicity in the mM range  
406 (<https://cfpub.epa.gov/ecotox/>). However, reported toxicity in *Daphnia* is at least an order of  
407 magnitude higher than our highest test concentration (100  $\mu$ M). Except for adenosine, caffeine,  
408 and histamine, we observed lethality at the highest 1-3 test concentrations for all compounds in  
409 regenerating and/or adult planarians, and any morphological or behavioral effects at these lethal



410 concentrations are therefore likely due to systemic toxicity. Thus, we focused our analysis on the  
411 sublethal morphological and behavioral effects of these compounds.

412

#### 413 **4.1 Differential effects in adult versus regenerating planarians**

414 All ten compounds produced behavioral changes at sublethal concentrations in both adult  
415 and regenerating planarians. Comparing outcomes for the two developmental stages, we  
416 discovered that many of the tested compounds caused differential effects in adult versus  
417 regenerating planarians. Lethality was generally induced at the same or lower concentrations in  
418 adult planarians than in regenerating planarians, similar to previously observed trends (Zhang et  
419 al. 2019a; Ireland et al. 2022). Only mianserin caused lethality at lower concentrations in  
420 regenerating planarians than in adults.

421 Looking at the sublethal effects on a per endpoint basis, we found that scrunching was a  
422 sensitive endpoint in adult planarians, with 6/10 compounds causing decreased scrunching in  
423 response to noxious heat. In contrast, only 3/10 compounds affected scrunching in regenerating  
424 planarians, with one hit being concentration-independent. Interestingly, regenerating planarians  
425 had more hits in the noxious stimulus strength measure, with 8/10 compounds showing effects (2  
426 concentration-independent), whereas in adult planarians only 5/10 had effects, and three of those  
427 were concentration-independent. The interpretation of these differences is difficult because the  
428 molecular regulation of noxious heat sensation and the planarians' behavioral responses are poorly  
429 understood. Cholinergic signaling seems to be involved in regulating planarian behavior in  
430 response to noxious heat because chemical and molecular inhibition of acetylcholinesterase can  
431 cause defects in these endpoints (Hagstrom et al. 2018b; Zhang et al. 2019b; Ireland et al. 2022).  
432 However, the identity of the heat sensitive receptors in *D. japonica* remains to be determined

433 (Sabry et al. 2019) as well as how the initial noxious heat sensation is processed in the nervous  
434 system to cause the stereotypical muscle-driven periodic body length scrunching oscillations  
435 (Cochet-Escartin et al. 2015).

436         Regenerating planarians had increased sensitivity to four of the tested compounds  
437 (forskolin, clenbuterol, mianserin, and fluoxetine), showing lower overall LOELs than the adult  
438 planarians. The most striking example of this increased sensitivity was fluoxetine, which only  
439 showed decreased anxiety and thermotaxis in adult planarians at 3.16  $\mu\text{M}$ , whereas it affected 12  
440 non-lethality endpoints in regenerating planarians, with effects starting as low as 0.0316  $\mu\text{M}$  (0.316  
441  $\mu\text{M}$  for concentration-dependent effects). The finding that both adult and regenerating planarians  
442 exposed to fluoxetine showed decreased anxiety may be related to fluoxetine's action as an SSRI.  
443 The diversity in phenotypic profiles between the two developmental stages suggests that different  
444 targets may also be affected by fluoxetine in regenerating planarians or that the same targets have  
445 different roles during development versus in the adult organism. One such target may be  
446 acetylcholinesterase, which has been found to be inhibited by fluoxetine in other systems (Müller  
447 et al. 2002) and has been suggested to play a role in development, which may or may not rely on  
448 its enzymatic activity (Bigbee et al. 2000; Paraoanu et al. 2006; Layer et al. 2013). However, we  
449 did not observe significant inhibition of acetylcholinesterase at 31.6  $\mu\text{M}$  fluoxetine, the highest  
450 sublethal tested concentration, in either adult or regenerating planarians. Notably, several of the  
451 effects in regenerating planarians were concentration-independent and/or indicative of  
452 hyperactivity, which may be the result of neuroactive and not neurotoxic effects of the drug. Since  
453 fluoxetine is approved for use in children as young as 8 years old to treat depression and bipolar  
454 disorder, the observed sensitivity of the regenerating worms suggests that further studies into  
455 possible adverse effects during neurodevelopment may be warranted.

456

## 457 **4.2 HTS can recapitulate findings from low-throughput studies**

458 Existing studies on these compounds in freshwater planarians or parasitic flatworms  
459 (*Schistosoma mansoni*) have been low-throughput and primarily based on manual scoring. Most  
460 studies focused on acute ( $\leq 3$  hours) effects in adult worms, with a few exceptions that also  
461 investigated the effect of subacute (3 - 24 hours), short-term (2-3 days) or chronic ( $>3$  days)  
462 exposure and/or on development and regeneration (reviewed in **Supplemental Table**). Inter-  
463 species comparisons with planarians can be challenging as different planarian species can have  
464 distinct sensitivities (Ireland et al. 2020) and even behavioral responses (Sabry et al. 2019) to the  
465 same chemical. However, comparisons are still useful to investigate whether HTS can recapitulate  
466 the general findings from low-throughput studies.

467 Decreases in motility have been found in adult flatworms acutely exposed to MDL-  
468 12,330A (Matsuyama et al. 2004), mianserin (Currie and Pearson 2013; Talbot et al. 2014; Chan  
469 et al. 2016; Shettigar et al. 2021), sertraline (Thumé and Frizzo 2017; Weeks et al. 2018), and high  
470 concentrations of caffeine (Best and Morita 1982; Moustakas et al. 2015). Previous studies on the  
471 effects of caffeine in planarians have only found behavioral effects at much higher concentrations  
472 than we tested here (mM instead of  $\mu\text{M}$ ). At these high concentrations, acute/subacute exposure to  
473 caffeine of different *Dugesia* species induced morphological defects (contractions and C-like  
474 hyperkinesia), paralysis, head lesions, and eventually death (Best and Morita 1982; Rawls et al.  
475 2010; Li 2013; Moustakas et al. 2015). We found that chronic exposure to low concentrations  
476 caused few behavioral or morphological effects, suggesting that low to moderate concentrations  
477 are tolerated by adult and developing planarians. Notably, moderate consumption of up to 200 mg

478 caffeine/day during pregnancy is considered safe by the American College of Obstetricians and  
479 Gynecologists (American College of Obstetricians 2010).

480 Acute exposure to mianserin has previously been shown to induce muscle-based movement  
481 in *Schmidtea mediterranea* planarians (Currie and Pearson 2013; Talbot et al. 2014). Our finding  
482 that low to mid-concentrations of mianserin cause a significant induction of muscle waves suggests  
483 that mianserin acts similarly in *D. japonica*. In addition to motility defects, exposure to 10  $\mu\text{M}$   
484 mianserin has been reported to induce regeneration of two-headed *D. japonica* planarians 6% of  
485 the time in amputated trunk pieces, suggesting weak effects on body axis polarity (Chan et al.  
486 2014). Here, defects in eye regeneration at day 7 were observed with 31.6  $\mu\text{M}$ , which causes  
487 significant lethality by day 12.

488 Acute to short-term exposure to sertraline has been reported to cause many morphological  
489 effects, including degeneration in the parasitic flatworm *S. mansoni* (Weeks et al. 2018) and  
490 induction of seizures, c-shapes, and screw-like hyperkinesia at low concentrations (1  $\mu\text{M}$ -10  $\mu\text{M}$ )  
491 in the freshwater planarian *Dugesia tigrina* (Thumé and Frizzo 2017), with 10  $\mu\text{M}$  causing lesions  
492 and death in *D. tigrina* at 72 hours. We also observed death at 10  $\mu\text{M}$  in both adult and regenerating  
493 planarians but did not observe any significant changes in morphology. However, it is possible that  
494 the observed body shape phenotypes are short-acting and thus would be missed by only screening  
495 the worms at days 7 and 12.

496 Increases in motility (hyperactivity) have been reported after exposure to fluoxetine  
497 (Patocka and Ribeiro 2013; Zewde et al. 2018; Ofoegbu et al. 2019b, a; Duguet et al. 2020) and  
498 forskolin (Matsuyama et al. 2004; de Saram et al. 2013; Hirst et al. 2016) in free-living and  
499 parasitic flatworms. We also observed hyperactivity with these chemicals in our HTS chronic  
500 exposure paradigm here. Most of the chronic effects of fluoxetine observed in this study were in

501 regenerating planarians, whereas past studies have primarily used adult organisms. However, one  
502 study has found decreased transformation of somules of the parasitic flatworm *S. mansoni* from  
503 the miracidium stage to the primary sporocyst stage after exposure to 2  $\mu\text{M}$  fluoxetine (Taft et al.  
504 2010). *S. mansoni* (Patocka and Ribeiro 2013; Duguet et al. 2020) and *S. mediterranea* (Ofoegbu  
505 et al. 2019b, a) exhibited increased motility in response to exposure to fluoxetine across varying  
506 time-scales. We also found increased speed and decreased resting at 0.316  $\mu\text{M}$  fluoxetine in  
507 regenerating worms.

508       Exposure to forskolin has been found to decrease transformation from the miracidium stage  
509 to the primary sporocyst stage in *S. mansoni* (Kawamoto et al. 1989; Taft et al. 2010). Similarly,  
510 we found that chronic exposure to 100  $\mu\text{M}$  forskolin induced lesions at day 7 in regenerating  
511 planarians which preceded death at day 12. As observed previously (Ireland et al. 2022), lesions  
512 appear to be an early indicator of systemic toxicity. Histamine (180  $\mu\text{M}$ ) has been found to induce  
513 morphological distortions (primarily supernumerary eyes) in regenerating trunk and tail fragments  
514 of *Dugesia lugubris* (Csaba and Bierbauer 1974). We did not observe any effects on eye  
515 regeneration at up to 100  $\mu\text{M}$  histamine, though we did find an increase in c-shapes and contraction  
516 on day 12 in 100  $\mu\text{M}$  histamine-exposed regenerating *D. japonica*.

517  
518       In summary, we find that our morphological and behavioral planarian HTS platform allows  
519 us to detect previously reported phenotypic changes induced by these compounds with robust,  
520 quantitative readouts, in a fraction of the time, and with the unique ability to distinguish between  
521 effects on the adult and the developing brain in a single experiment. Moreover, for adult planarians,  
522 additional screening could be performed to evaluate acute effects (except for noxious heat  
523 sensation, which has negative health consequences and thus is only evaluated on the last screening

524 day); regenerating worms are largely immobile initially, hampering behavioral assays, but  
525 morphological changes could still be evaluated.

526

### 527 **4.3 Efficacy versus toxicity**

528 Parsing out efficacy from toxicity at sublethal concentrations for chronic exposure  
529 conditions is difficult, especially since the pharmacology of these compounds in planarians is not  
530 understood. Chronic exposure scenarios are important to study, however, because these chemicals  
531 are being used for weeks, months, or years. Naively, we expected to see phenotypic patterns  
532 reflecting that compounds with a shared mechanism of action will activate (agonists) or block  
533 (antagonist) similar molecular pathways. However, except for the few instances highlighted in the  
534 Results (Section 3), there was not a clear pattern within effects caused by agonistic and antagonistic  
535 drug pairs. Partially, this may be a question of concentration; since we expect effects to be  
536 concentration-dependent, it may be difficult to ascertain the observed antagonistic profiles when  
537 summarizing effects across concentrations, as done here. For example, mianserin showed several  
538 hyperactive hits at low concentrations in regenerating planarians, but only hypoactive hits at higher  
539 concentrations. Mianserin has a complex pharmacology as it can act as an antagonist at histamine  
540 receptors, serotonin (5-HT) receptors and  $\alpha_2$  adrenoceptors, with varying levels of affinity (Pinder  
541 2009) and has been shown to reduce the activity of 5-HT receptors in *D. japonica* (Chan et al.  
542 2016). Thus, depending on the concentration, mianserin could be differentially targeting these  
543 various receptors, leading to changes in phenotypic outcomes. It is possible that these hyperactive  
544 hits for mianserin, as well as the ones observed with forskolin and fluoxetine, are indicative of  
545 desired neuroactive effects whereas the hypoactive effects reflect neurotoxicity. Timing can also  
546 be an important factor here, as we would expect neuroactive effects to manifest quicker than

547 adverse effects; however, both are determined by compound metabolism, which is unknown in  
548 planarians.

549 One limitation of our HTS paradigm is static chemical exposure, which does not accurately  
550 capture human consumption of these chemicals, which would be dynamic, with regular, repeated  
551 dosing. If chemicals were replaced daily, the sensitivity would likely be increased; however, it is  
552 unclear whether the endpoints affected would change or the responses would simply be shifted to  
553 lower concentrations. Having a direct comparison of these two exposure scenarios would be an  
554 interesting future avenue for specific case studies but daily solution changes are clearly not  
555 practical for HTS of many chemicals, whose purpose is to provide rapid and efficient hazard  
556 identification and prioritization of compounds for further in-depth studies.

557

## 558 **Acknowledgements**

559 The authors would like to thank Veronica Bochenek for help with data analysis. Kevin Bayingana  
560 was funded by the Tarble Summer Research Fellowship. Elizabeth Rosenthal was funded by the  
561 Frances Velay Women's Science Summer Research Fellowship from the Panaphil Foundation.

562

## 563 **References**

564 American College of Obstetricians (2010) ACOG Committee Opinion No. 462: Moderate  
565 caffeine consumption during pregnancy. *Obstet Gynecol* 116:467–468.  
566 <https://doi.org/10.1097/AOG.0B013E3181EEB2A1>  
567 Bal-Price AK, Hogberg HT, Buzanska L, Coecke S (2010) Relevance of in vitro neurotoxicity

- 568 testing for regulatory requirements: challenges to be considered. *Neurotoxicol Teratol*  
569 32:36–41. <https://doi.org/10.1016/J.NTT.2008.12.003>
- 570 Best JB, Morita M (1982) Planarians as a model system for in vitro teratogenesis studies.  
571 *Teratog Carcinog Mutagen* 2:277–291. [https://doi.org/10.1002/1520-](https://doi.org/10.1002/1520-6866(1990)2:3/4<277::AID-TCM1770020309>3.0.CO;2-8)  
572 6866(1990)2:3/4<277::AID-TCM1770020309>3.0.CO;2-8
- 573 Bigbee JW, Sharma K V, Chan EL, Bögler O (2000) Evidence for the direct role of  
574 acetylcholinesterase in neurite outgrowth in primary dorsal root ganglion neurons. *Brain*  
575 Res 861:354–362. [https://doi.org/10.1016/S0006-8993\(00\)02046-1](https://doi.org/10.1016/S0006-8993(00)02046-1)
- 576 Billington CK, Penn RB, Hall IP (2017)  $\beta$ 2-agonists. *Handb Exp Pharmacol* 237:23.  
577 [https://doi.org/10.1007/164\\_2016\\_64](https://doi.org/10.1007/164_2016_64)
- 578 Chan JD, Agbedanu PN, Zamanian M, et al (2014) ‘Death and Axes’: Unexpected Ca<sup>2+</sup> Entry  
579 Phenologs Predict New Anti-schistosomal Agents. *PLOS Pathog* 10:e1003942.  
580 <https://doi.org/10.1371/JOURNAL.PPAT.1003942>
- 581 Chan JD, Grab T, Marchant JS (2016) Kinetic profiling an abundantly expressed planarian  
582 serotonergic GPCR identifies bromocriptine as a perdurant antagonist. *Int J Parasitol Drugs*  
583 *Drug Resist* 6:356–363. <https://doi.org/10.1016/j.ijpddr.2016.06.002>
- 584 Chang EA, Beyhan Z, Yoo MS, et al (2009) Increased cellular turnover in response to fluoxetine  
585 in neuronal precursors derived from human embryonic stem cells. *Int J Dev Biol* 54:707–  
586 715. <https://doi.org/10.1387/IJDB.092851EC>
- 587 Chen L, Bell EM, Browne ML, et al (2014) Exploring maternal patterns of dietary caffeine  
588 consumption before conception and during pregnancy. *Matern Child Health J* 18:2446–



- 589 2455. <https://doi.org/10.1007/S10995-014-1483-2>
- 590 Chifiriuc MC, Ratiu AC, Popa M, Ecovoiu A AI (2016) Drosophotoxicology: An Emerging  
591 Research Area for Assessing Nanoparticles Interaction with Living Organisms. *Int J Mol*  
592 *Sci* 17:. <https://doi.org/10.3390/IJMS17020036>
- 593 Cipriani A, Furukawa TA, Salanti G, et al (2009) Comparative efficacy and acceptability of 12  
594 new-generation antidepressants: a multiple-treatments meta-analysis. *Lancet* 373:746–758.  
595 [https://doi.org/10.1016/S0140-6736\(09\)60046-5](https://doi.org/10.1016/S0140-6736(09)60046-5)
- 596 Cochet-Escartin O, Mickolajczk KJ, Collins E-MS (2015) Scrunching: a novel escape gait in  
597 planarians. *Phys Biol* 12:055001. <https://doi.org/doi:10.1088/1478-3975/12/5/056010>
- 598 Csaba G, Bierbauer J (1974) Investigations on the specificity of hormone receptors in planarians.  
599 *Gen Comp Endocrinol* 22:132–134. [https://doi.org/10.1016/0016-6480\(74\)90095-1](https://doi.org/10.1016/0016-6480(74)90095-1)
- 600 Currie KW, Pearson BJ (2013) Transcription factors *lhx1/5-1* and *pitx* are required for the  
601 maintenance and regeneration of serotonergic neurons in planarians. *Dev* 140:3577–3588.  
602 <https://doi.org/10.1242/dev.098590>
- 603 Daw JR, Hanley GE, Greyson DL, Morgan SG (2011) Prescription drug use during pregnancy in  
604 developed countries: a systematic review. *Pharmacoepidemiol Drug Saf* 20:895–902.  
605 <https://doi.org/10.1002/PDS.2184>
- 606 de Saram PSR, Ressurreição M, Davies AJ, et al (2013) Functional Mapping of Protein Kinase A  
607 Reveals Its Importance in Adult *Schistosoma mansoni* Motor Activity. *PLoS Negl Trop Dis*  
608 7:. <https://doi.org/10.1371/journal.pntd.0001988>
- 609 Dubovicky M, Belovicova K, Csatlosova K, Bogi E (2017) Risks of using SSRI / SNRI

- 610 antidepressants during pregnancy and lactation. *Interdiscip Toxicol* 10:30.  
611 <https://doi.org/10.1515/INTOX-2017-0004>
- 612 Duguet TB, Glebov A, Hussain A, et al (2020) Identification of annotated bioactive molecules  
613 that impair motility of the blood fluke *Schistosoma mansoni*. *Int J Parasitol Drugs Drug*  
614 *Resist* 13:73–88. <https://doi.org/10.1016/j.ijpddr.2020.05.002>
- 615 Ellman GL, Courtney KD, Andres V, Featherstone RM (1961) A new and rapid colorimetric  
616 determination of acetylcholinesterase activity. *Biochem Pharmacol* 7:88–95.  
617 [https://doi.org/10.1016/0006-2952\(61\)90145-9](https://doi.org/10.1016/0006-2952(61)90145-9)
- 618 Ferrero S, Colombo BM, Ragni N (2004) Maternal arrhythmias during pregnancy. *Arch Gynecol*  
619 *Obstet* 269:244–253. <https://doi.org/10.1007/S00404-002-0461-X>
- 620 Giacomotto J, Ségalat L (2010) High-throughput screening and small animal models, where are  
621 we? *Br J Pharmacol* 160:204. <https://doi.org/10.1111/J.1476-5381.2010.00725.X>
- 622 Haas DM, Marsh DJ, Dang DT, et al (2018) Prescription and Other Medication Use in  
623 Pregnancy. *Obstet Gynecol* 131:789. <https://doi.org/10.1097/AOG.0000000000002579>
- 624 Hagstrom D, Cochet-Escartin O, Collins E-MS (2016) Planarian brain regeneration as a model  
625 system for developmental neurotoxicology. *Regeneration* 3:65–77.  
626 <https://doi.org/10.1002/reg2.52>
- 627 Hagstrom D, Cochet-Escartin O, Zhang S, et al (2015) Freshwater planarians as an alternative  
628 animal model for neurotoxicology. *Toxicol Sci* 147:270–285.  
629 <https://doi.org/10.1093/toxsci/kfv129>
- 630 Hagstrom D, Hirokawa H, Zhang L, et al (2017) Planarian cholinesterase: in vitro

- 631 characterization of an evolutionarily ancient enzyme to study organophosphorus pesticide  
632 toxicity and reactivation. Arch Toxicol 91:2837–2847. <https://doi.org/10.1007/s00204-016->  
633 1908-3
- 634 Hagstrom D, Zhang S, Ho A, et al (2018a) Planarian cholinesterase: molecular and functional  
635 characterization of an evolutionarily ancient enzyme to study organophosphorus pesticide  
636 toxicity. Arch Toxicol 92:1161–1176. <https://doi.org/10.1007/s00204-017-2130-7>
- 637 Hagstrom D, Zhang S, Ho A, et al (2018b) Planarian cholinesterase: molecular and functional  
638 characterization of an evolutionarily ancient enzyme to study organophosphorus pesticide  
639 toxicity. Arch Toxicol 92:1161–1176. <https://doi.org/10.1007/s00204-017-2130-7>
- 640 Hansen C, Desrosiers TA, Wisniewski K, et al (2020) Use of antihistamine medications during  
641 early pregnancy and selected birth defects: The National Birth Defects Prevention Study,  
642 1997–2011. Birth Defects Res 112:1234–1252. <https://doi.org/10.1002/BDR2.1749>
- 643 Helmcke KJ, Avila DS, Aschner M (2010) Utility of *Caenorhabditis elegans* in high throughput  
644 neurotoxicological research. Neurotoxicol Teratol 32:62–67.  
645 <https://doi.org/10.1016/J.NTT.2008.11.005>
- 646 Hirst NL, Lawton SP, Walker AJ (2016) Protein kinase A signalling in *Schistosoma mansoni*  
647 cercariae and schistosomules. Int J Parasitol 46:425–437.  
648 <https://doi.org/10.1016/j.ijpara.2015.12.001>
- 649 Hunt PR, Camacho JA, Sprando RL (2020) *Caenorhabditis elegans* for predictive toxicology.  
650 Curr Opin Toxicol 23–24:23–28. <https://doi.org/10.1016/J.COTOX.2020.02.004>
- 651 Ireland D, Bochenek V, Chaiken D, et al (2020) *Dugesia japonica* is the best suited of three

- 652 planarian species for high-throughput toxicology screening. *Chemosphere* 253:126718.  
653 <https://doi.org/10.1016/j.chemosphere.2020.126718>
- 654 Ireland D, Zhang S, Bochenek V, et al (2022) Differences in neurotoxic outcomes of  
655 organophosphorus pesticides revealed via multi-dimensional screening in adult and  
656 regenerating planarians. *bioRxiv* 496617
- 657 Joglar JA, Page RL (2012) Treatment of Cardiac Arrhythmias During Pregnancy. *Drug Saf* 1999  
658 201 20:85–94. <https://doi.org/10.2165/00002018-199920010-00008>
- 659 Kawamoto F, Shozawa A, Kumada N, Kojima K (1989) Possible roles of cAMP and Ca<sup>2+</sup> in the  
660 regulation of miracidial transformation in *Schistosoma mansoni*. *Parasitol Res* 75:368–374.  
661 <https://doi.org/10.1007/BF00931132>
- 662 Kokel D, Rennekamp AJ, Shah AH, et al (2012) Behavioral barcoding in the cloud: embracing  
663 data-intensive digital phenotyping in neuropharmacology. *Trends Biotechnol* 30:421–425.  
664 <https://doi.org/10.1016/j.tibtech.2012.05.001>
- 665 Layer PG, Klaczinski J, Salfelder A, et al (2013) Cholinesterases in development: AChE as a  
666 firewall to inhibit cell proliferation and support differentiation. *Chem Biol Interact*  
667 203:269–276. <https://doi.org/10.1016/j.cbi.2012.09.014>
- 668 Li MH (2013) Acute toxicity of 30 pharmaceutically active compounds to freshwater planarians,  
669 *Dugesia japonica*. *Toxicol Environ Chem* 95:1157–1170.  
670 <https://doi.org/10.1080/02772248.2013.857671>
- 671 Matsuyama H, Takahashi H, Watanabe K, et al (2004) The involvement of cyclic adenosine  
672 monophosphate in the control of *Schistosoma* miracidium cilia. *J Parasitol* 90:8–14.

- 673 <https://doi.org/10.1645/GE-52R1>
- 674 Moustakas D, Mezzio M, Rodriguez BR, et al (2015) Guarana provides additional stimulation  
675 over caffeine alone in the planarian model. PLoS One 10:.  
676 <https://doi.org/10.1371/journal.pone.0123310>
- 677 Müller TC, Rocha JBT, Morsch VM, et al (2002) Antidepressants inhibit human  
678 acetylcholinesterase and butyrylcholinesterase activity. Biochim Biophys Acta 1587:92–98.  
679 [https://doi.org/10.1016/S0925-4439\(02\)00071-6](https://doi.org/10.1016/S0925-4439(02)00071-6)
- 680 OECD (2021) Guideline No. 497: Defined Approaches on Skin Sensitisation. In: OECD  
681 Guidelines for the Testing of Chemicals. OECD Publishing, Paris
- 682 Ofoegbu PU, Campos D, Soares AMVM, Pestana JLT (2019a) Combined effects of NaCl and  
683 fluoxetine on the freshwater planarian, *Schmidtea mediterranea* (Platyhelminthes:  
684 Dugesidae). Environ Sci Pollut Res 26:11326–11335. [https://doi.org/10.1007/s11356-019-](https://doi.org/10.1007/s11356-019-04532-4)  
685 [04532-4](https://doi.org/10.1007/s11356-019-04532-4)
- 686 Ofoegbu PU, Lourenço J, Mendo O, et al (2019b) Effects of low concentrations of psychiatric  
687 drugs (carbamazepine and fluoxetine) on the freshwater planarian, *Schmidtea mediterranea*.  
688 Chemosphere 217:542–549. <https://doi.org/10.1016/j.chemosphere.2018.10.198>
- 689 Paroanu LE, Steinert G, Klaczinski J, et al (2006) On functions of cholinesterases during  
690 embryonic development. J Mol Neurosci 30:201–4. <https://doi.org/10.1385/JMN:30:1:201>
- 691 Patocka N, Ribeiro P (2013) The functional role of a serotonin transporter in *Schistosoma*  
692 *mansoni* elucidated through immunolocalization and RNA interference (RNAi). Mol  
693 Biochem Parasitol 187:32–42. <https://doi.org/10.1016/j.molbiopara.2012.11.008>

- 694 Peterson RT, Nass R, Boyd WA, et al (2008) USE OF NON-MAMMALIAN ALTERNATIVE  
695 MODELS FOR NEUROTOXICOLOGICAL STUDY. *Neurotoxicology* 29:546.  
696 <https://doi.org/10.1016/J.NEURO.2008.04.006>
- 697 Pinder RM (2009) Mianserin: Pharmacological and clinical correlates.  
698 <http://dx.doi.org/103109/08039489109096678> 45:13–26.  
699 <https://doi.org/10.3109/08039489109096678>
- 700 Rand MD (2010) Drosophotoxicology: the growing potential for Drosophila in neurotoxicology.  
701 *Neurotoxicol Teratol* 32:74. <https://doi.org/10.1016/J.NTT.2009.06.004>
- 702 Rawls SM, Patil T, Yuvasheva E, Raffa RB (2010) First evidence that drugs of abuse produce  
703 behavioral sensitization and cross sensitization in planarians. *Behav Pharmacol* 21:301–313.  
704 <https://doi.org/10.1097/FBP.0b013e32833b0098>
- 705 Ruszkiewicz JA, Pinkas A, Miah MR, et al (2018) C. elegans as a model in developmental  
706 neurotoxicology. *Toxicol Appl Pharmacol* 354:126–135.  
707 <https://doi.org/10.1016/J.TAAP.2018.03.016>
- 708 Sabry Z, Ho A, Ireland D, et al (2019) Pharmacological or genetic targeting of Transient  
709 Receptor Potential (TRP) channels can disrupt the planarian escape response. *PLoS One*  
710 14:e0226104. <https://doi.org/10.1371/journal.pone.0226104>
- 711 Ségalat L (2007) Invertebrate animal models of diseases as screening tools in drug discovery.  
712 *ACS Chem Biol* 2:231–236. <https://doi.org/10.1021/CB700009M>
- 713 Servey J, Chang J (2014) Over-the-Counter Medications in Pregnancy - American Family  
714 Physician. *Am Fam Physician* 90:548–555

- 715 Shettigar N, Chakravarthy A, Umashankar S, et al (2021) Discovery of a body-wide  
716 photosensory array that matures in an adult-like animal and mediates eye-brain-independent  
717 movement and arousal. *Proc Natl Acad Sci U S A* 118:.  
718 <https://doi.org/10.1073/PNAS.2021426118>
- 719 So M, Bozzo P, Inoue M, Einarson A (2010) Safety of antihistamines during pregnancy and  
720 lactation. *Can Fam Physician* 56:427
- 721 Taft AS, Norante FA, Yoshino TP (2010) The identification of inhibitors of *Schistosoma*  
722 *mansoni* miracidial transformation by incorporating a medium-throughput small-molecule  
723 screen. *Exp Parasitol* 125:84–94. <https://doi.org/10.1016/j.exppara.2009.12.021>
- 724 Talbot JA, Currie KW, Pearson BJ, Collins EMS (2014) Smed-dynA-1 is a planarian nervous  
725 system specific dynamin 1 homolog required for normal locomotion. *Biol Open* 3:627–634.  
726 <https://doi.org/10.1242/bio.20147583>
- 727 The Canadian Preterm Labor Investigators Group (1992) Treatment of Preterm Labor with the  
728 Beta-Adrenergic Agonist Ritodrine. *N Engl J Med* 327:308–312.  
729 <https://doi.org/10.1056/NEJM199207303270503>
- 730 Thumé IS, Frizzo ME (2017) Sertraline Induces Toxicity and Behavioral Alterations in  
731 Planarians. *Biomed Res Int* 2017:.  
<https://doi.org/10.1155/2017/5792621>
- 732 Weeks JC, Roberts WM, Leasure C, et al (2018) Sertraline, Paroxetine, and Chlorpromazine Are  
733 Rapidly Acting Anthelmintic Drugs Capable of Clinical Repurposing. *Sci Rep* 8:.  
734 <https://doi.org/10.1038/s41598-017-18457-w>
- 735 Witter FR, Zimmerman AW, Reichmann JP, Connors SL (2009) In utero beta 2 adrenergic

736 agonist exposure and adverse neurophysiologic and behavioral outcomes. *Am J Obstet*  
737 *Gynecol* 201:553–559. <https://doi.org/10.1016/J.AJOG.2009.07.010>

738 Wu JP, Li MH (2018) The use of freshwater planarians in environmental toxicology studies:  
739 Advantages and potential. *Ecotoxicol Environ Saf* 161:45–56.  
740 <https://doi.org/10.1016/j.ecoenv.2018.05.057>

741 Yang M, Liu S, Hu L, et al (2018) Effects of the antidepressant, mianserin, on early development  
742 of fish embryos at low environmentally relevant concentrations. *Ecotoxicol Environ Saf*  
743 150:144–151. <https://doi.org/10.1016/J.ECOENV.2017.12.024>

744 Zewde AM, Yu F, Nayak S, et al (2018) PLDT (planarian light/dark test): an invertebrate assay  
745 to quantify defensive responding and study anxiety-like effects. *J Neurosci Methods*  
746 293:284–288. <https://doi.org/10.1016/j.jneumeth.2017.10.010>

747 Zhang S, Hagstrom D, Hayes P, et al (2019a) Multi-behavioral endpoint testing of an 87-  
748 chemical compound library in freshwater planarians. *Toxicol Sci* 167:105–115.  
749 <https://doi.org/10.1093/toxsci/kfy145>

750 Zhang S, Ireland D, Sipes NS, et al (2019b) Screening for neurotoxic potential of 15 flame  
751 retardants using freshwater planarians. *Neurotoxicol Teratol* 73:54–66.  
752 <https://doi.org/10.1016/j.ntt.2019.03.003>

753
